### 1101 Closed Traumatic Avulsion of Both Flexor Digitorum Tendons: A Novel Treatment Method

C. Cuggy, J. Woods, C. Emma, J. Natalie, D. Roisin, N. Lynch  
*St Vincents University Hospital, Dublin, Ireland*

**Case Report:** Closed tendon avulsion of both flexor tendons (Flexor Digitorum profundus [FDP] and Flexor Digitorum superficialis [FDS]) in the same finger is an extremely rare condition. We are proposing this subtype of injury be added as a type VI to the current Leddy and Packer classification for FDP avulsion injuries. The objective of this being an increase in awareness to avoid misdiagnosis and to aid in the subsequent management if encountered. We present the case of a 27-year-old male who presented with an avulsion of both flexor tendons from their respective insertions in the ring finger following a sporting injury causing hyperextension against an actively flexed distal interphalangeal joint. This condition has previously been reported twelve times in the literature. We propose a novel treatment method not described for previous cases and examine the successful method of treatment in this case.
